# Supplementary material
Source: PubMed Central journal article supplement (PMC3143360)
Supplement: NIHMS303402-supplement-Tables.pdf [file NIHMS303402-supplement-Tables.pdf]

**Suppl. Table 1. Sequencing primers.**

| <b><i>B-RAF</i></b>  | <b>Forward</b>                    | <b>Reverse</b>                |
|----------------------|-----------------------------------|-------------------------------|
| Exon1                | CGGCGACTTCTCGTCGTCTC              | CTGCATGACGGAGAGGGACA          |
| Exon2                | CTGGCAGTTACTGTGATGATGTTG          | CTTCCCAAATCTATTCTAATCCCACC    |
| Exon3                | GGACCATCTAGATATCACATATG           | CATTCCTGTATGACATGGATGCCTC     |
| Exon4                | GTAGAAATGGTGTGTATCTGACC           | GATCAAAGTAACAAACCCCTACAGTC    |
| Exon5                | CGATGGAATATTAGGGAGCCAAACC         | CTAAACAAATGTTGGCCTCTAGG       |
| Exon6                | GTTGTCAAGCTTGAAATCAGTTGC          | CTGTATAGCTGAACCAGCATTAC       |
| Exon7                | CTGAGAATGGAATTTGATCTC             | GCATGTCACTGAAGAGCAGAAGTC      |
| Exon8                | CTTGAGCAAAGCAGCTTTGGC             | CAGAAGCTTTTCTGATTTGTGATTC     |
| Exon9                | GTGTCCACTTGTCTTATCATTGAGC         | GTTTCTCTACACATTTTTCTCTGTG     |
| Exon10               | GTATGTGTCTATGTCTATCATC            | GAATTCTGTGTACACATATGGAC       |
| Exon11               | CTCTTCTGTATCCCTCAGGC              | GGTAGGAGTCCCGACTGCTGTGAAC     |
| Exon12               | CTAGTACAGGAATATCATTGTTAG          | CTATCAGCCATACCATATAACATTGC    |
| Exon13               | GTAGGAGGTTAGACTTGGCAATTGC         | GTTAGCATCCTTATGTTCTCTGGAC     |
| Exon14               | CTTGACTGGAGTGAAAGGTTTG            | CAGGCTGTGGTATCCTGCTCTCC       |
| Exon15               | GACTCTAAGAGGAAAGATGAAGTAC         | GTTGAGACCTTCAATGACTTTCTAG     |
| Exon16               | CTGTCTCTTCTGAGTATGTAG             | CTATCCTTACGCTTACCCAGGAG       |
| Exon17               | GTGGGTTTCCACCATCTATGATG           | GAGTCTGCACATAGAATCCAAACTC     |
| Exon18               | GATTTGAGGTGCTTTCTTGAAAGTG         | CCACACAAGTGTCTTTGGTTC         |
| <b><i>PDGFRβ</i></b> | <b>Forward</b>                    | <b>Reverse</b>                |
| Primer 1             | AGAGGGCAGTAAGGAGGACTTCC           | ACCTCCCTGTCCCAATGGTGG         |
| Primer 2             | ACAGACCCACAGCTGGTGGTG             | TCTGCCACCTTCACGCGAACC         |
| Primer 3             | ACCGCCCACTGTCCTGTGGTTC            | AGTCATAGGGCAGCTGCATGGG        |
| Primer 4             | TGATCTCAGCCATCCTGGCCC             | TAGTTGGAGGACTCGATGTCTGC       |
| Primer 5             | ATGTGTCCTTGACCGGGGAGAG            | AGTCTCTCGAGAAGCAGCACCAG       |
| Primer 6             | TACCCAGAGCTGCCATGAACG             | AGAAGGGGACAGCTGATAAGGGC       |
| <b><i>N-RAS</i></b>  | <b>Forward</b>                    | <b>Reverse</b>                |
| Exon1                | TAAAGTACTGTAGATGTGGCTCGCC         | ACAGAATATGGGTAAAGATGATCCGAC   |
| Exon2                | GGCTTGAATAGTTAGATGCTATTTAACCTTGGC | GCTCTATCTTCCCTAGTGTGGTAACTC   |
| Exon3                | CCACTGTACCCAGCCTAATC              | AAGAGACAGAGGCTGCAGTG          |
| Exon4                | ACACCAGCCCGTTTATGGCT              | TGTGCAGAAGAGGATAGGCAGA        |
| <b><i>K-RAS</i></b>  | <b>Forward</b>                    | <b>Reverse</b>                |
| Exon1                | AAGGTACTGGTGGAGTATTTG             | GTAICTCATGAAAATGGTCAGAG       |
| Exon2                | TGAAGTAAAAGGTGCACTGTAATAATCCAG    | CATTTATAAACAGGGATATTACCTACCTC |
| Exon3                | TGACAAAAGTTGTGGACAGGT             | GCAATGCCCTCTCAAGAGACAA        |
| Exon4                | ACAAAACACCTATGCGGATGACA           | AACAGTCTGCATGGAGCAGG          |
| <b><i>H-RAS</i></b>  | <b>Forward</b>                    | <b>Reverse</b>                |
| Exon1                | GGCTGAGCAGGGCCCTCCTTGGCAGG        | GCCCTATCCTGGCTGTGTCTGGGC      |
| Exon2                | GGTACCAGGGAGAGGCTGGCTGTGTGAAC     | CAGCGGCATCCAGGACATGCGCAG      |
| Exon3                | TACAGGTGAACCCCGTGAGG              | GGAGAGGGTCACTGAGTGCT          |
| Exon4                | ACCTTTGAGGGGCTGCTGTA              | CACAAGGGAGGCTGCTGAC           |

| <b>MEK1</b> | <b>Forward</b>           | <b>Reverse</b>         |
|-------------|--------------------------|------------------------|
| Exon2       | GCTTTCTTTCCATGATAGGAGTAC | ATCAGTCTTCCTTCTACCCTGG |
| Exon3       | CCTGTTTCTCCTCCCTCTACC    | ACACCCACCAGGAATACTGC   |

**Suppl. Table 2.** Patient characteristics, available patient-matched tumor samples and tumor-matched short-term cultures, and summary of *B-RAF/RAS* sequencing and PDGFR $\beta$  expression.

| Patient ID | Sex | Age | Stage | Best overall response | Progression free survival (days) | Biopsy & culture ID     | Site of biopsy                 | <i>B-RAF</i> exons 1-14, 16-18 | <i>B-RAF</i> exon 15 | <i>N-RAS</i> | <i>K-RAS</i> | <i>H-RAS</i> | PDGFR $\beta$ |
|------------|-----|-----|-------|-----------------------|----------------------------------|-------------------------|--------------------------------|--------------------------------|----------------------|--------------|--------------|--------------|---------------|
| Pt23       | M   | 62  | M1a   | 57%                   | 466                              | Pt23 baseline           | SC mass-thigh                  | N/D                            | V600E                | N/D          | N/D          | N/D          | –             |
|            |     |     |       |                       |                                  | Pt23 resistant          | Large bowel (cecum)            | WT <sup>^</sup>                | V600E                | WT           | WT           | WT           | +             |
| Pt43       | M   | 52  | M1c   | 83%                   | 161                              | Pt43 baseline           | Pelvic bone metastasis         | N/D                            | V600E                | N/D          | N/D          | N/D          | –             |
|            |     |     |       |                       |                                  | Pt43 resistant          | Bowel                          | WT <sup>^</sup>                | V600E                | WT           | WT           | WT           | –             |
| Pt48       | M   | 30  | M1b   | 14%                   | 113                              | Pt48 baseline           | SC mass, shoulder              | N/D                            | V600E                | N/D          | N/D          | N/D          | –             |
|            |     |     |       |                       |                                  | Pt48 resistant          | Heart                          | WT                             | V600E                | WT           | WT           | WT           | +             |
|            |     |     |       |                       |                                  | Pt48 R                  | Heart                          | WT                             | V600E                | WT           | WT           | WT           | +             |
| Pt55       | F   | 65  | M1c   | 37%                   | 270                              | Pt55 baseline           | Femoral node                   | N/D                            | V600E                | WT           | N/D          | N/D          | –             |
|            |     |     |       |                       |                                  | Pt55 resistant DP1      | Inguinal node*                 | WT                             | V600E                | Q61K         | WT           | WT           | –             |
|            |     |     |       |                       |                                  | Pt55 R                  | Inguinal node*                 | WT                             | V600E                | Q61K         | WT           | WT           | –             |
|            |     |     |       |                       |                                  | Pt55 resistant DP2      | Small bowel                    | WT                             | V600E                | Q61R         | WT           | WT           | N/D           |
|            |     |     |       |                       |                                  | Pt55 R2                 | Small bowel                    | WT                             | V600E                | Q61R         | WT           | WT           | N/D           |
| Pt56       | F   | 45  | M1c   | 53%                   | 106                              | Pt56 baseline           | Right pubic area               | N/D                            | V600E                | N/D          | N/D          | N/D          | –             |
|            |     |     |       |                       |                                  | Pt56 resistant          | Right pubic (labial)           | WT <sup>^</sup>                | V600E                | WT           | WT           | WT           | –             |
| Pt81       | M   | 44  | M1a   | 73%                   | 141                              | Pt81 baseline           | SC                             | N/D                            | V600E                | N/D          | N/D          | N/D          | –             |
|            |     |     |       |                       |                                  | Pt81 resistant          | Small bowel                    | WT <sup>^</sup>                | V600E                | WT           | WT           | WT           | –             |
| Pt84       | M   | 60  | M1c   | 84%                   | 113                              | Pt84 baseline           | Cutaneous                      | N/D                            | V600E                | N/D          | N/D          | N/D          | –             |
|            |     |     |       |                       |                                  | Pt84 resistant          | Cutaneous                      | WT                             | V600E                | WT           | WT           | WT           | –             |
| Pt92       | M   | 46  | M1a   | 32%                   | 149                              | Pt92 day 15             | Axillary node                  | N/D                            | V600E                | N/D          | N/D          | N/D          | –             |
|            |     |     |       |                       |                                  | Pt92 resistant          | Abdominal mass                 | WT                             | V600E                | WT           | WT           | WT           | +             |
| Pt111-001  | F   | 66  | M1b   | 53%                   | 137                              | Pt111-001 baseline      | Cutaneous, left clavicular**   | N/D                            | V600E                | WT           | WT           | WT           | –             |
|            |     |     |       |                       |                                  | Pt111-001 resistant DP1 | Cutaneous, left lateral neck** | WT <sup>#</sup>                | V600E                | WT           | WT           | WT           | –             |
|            |     |     |       |                       |                                  | Pt111-001 resistant DP2 | Cutaneous, left clavicular**   | WT <sup>#</sup>                | V600E                | WT           | WT           | WT           | –             |

|           |   |    |     |     |     |                         |                                          |      |       |     |     |     |     |
|-----------|---|----|-----|-----|-----|-------------------------|------------------------------------------|------|-------|-----|-----|-----|-----|
|           |   |    |     |     |     | Pt111-001 resistant DP3 | Cutaneous, left shoulder**               | WT#  | V600E | WT  | WT  | WT  | –   |
| Pt111-005 | M | 72 | M1c | 42% | 126 | Pt111-005 baseline      | N/A                                      | N/A  | N/A   | N/A | N/A | N/A | N/A |
|           |   |    |     |     |     | Pt111-005 resistant     | Adrenal gland                            | WT   | V600E | WT  | WT  | WT  | N/D |
|           |   |    |     |     |     | Pt111-001 R             | Adrenal gland                            | WT   | V600E | WT  | WT  | WT  | –   |
| Pt111-010 | M | 48 | M1c | 24% | 126 | Pt111-010 baseline      | Lymph node, left inguinal                | N/D  | V600E | N/D | N/D | N/D | –   |
|           |   |    |     |     |     | Pt111-010 resistant DP1 | Cutaneous, left anterior thigh, superior | WT#  | V600E | WT  | WT  | WT  | N/D |
|           |   |    |     |     |     | Pt111-010 resistant DP2 | Cutaneous, left anterior thigh, inferior | WT^# | V600E | WT  | WT  | WT  | –   |
|           |   |    |     |     |     | Pt111-010 R             | Cutaneous, left anterior thigh, inferior | WT   | V600E | WT  | WT  | WT  | –   |
| Pt104-004 | M | 54 | M1c | 75% | 84  | Pt104-004 baseline      | Lung                                     | N/D  | V600E | N/D | N/D | N/D | –   |
|           |   |    |     |     |     | Pt104-004 resistant     | Pelvic mass                              | WT   | V600E | WT  | WT  | WT  | +   |

Mutation status of *B-RAF* and *RAS* genes and PDGFR $\beta$  expression status are summarized for a collection of PLX4032 clinical trial biopsy samples and tumor-matched short-term cultures. Samples labeled as resistant are from tumors that initially responded to (PR 30% by RECIST criteria) and then progressed on PLX4032. Abbreviations and symbols: M, male; F, female; SC, subcutaneous; Pt# R, short-term culture derived from tissue directly above; DP, disease progression; N/D, not done; N/A, not available; \* shown in Suppl. Fig. 4a; \*\* shown in Suppl. Fig. 4b; ^ shown by ultradeep sequencing (Suppl. Fig. 6) in addition to Sanger sequencing; # shown by deep sequencing (Suppl. Fig. 7) as well as Sanger sequencing. Blue, pertinent negative results. Red, pertinent positive results. PDGFR $\beta$  expression determined by immunohistochemistry (IHC) for tissues and immunoblotting for short-term cultures (relative to PLX4032-sensitive parental and PLX4032-resistant sub-lines). PDGFR $\beta$  IHC is performed only for the available eleven, baseline/resistant, patient-paired, tumor samples and defined as positive if specific immuno-reactivity exceeds 20% within representative tumor sections (example shown in Suppl. Fig. 13).

**Suppl. Table 3.** Gene Set Enrichment Analysis of differential expressed genes in M229 P vs. R5 (top) and M238 P vs. R1 (bottom).

| Molecular Signature Database Gene Set        | # of Differentially Expressed Genes in the Set | # of Genes in the Set | p-value for Enrichment (Fisher's Exact Test) | List of Differentially Expressed Genes in the Set                                                                                                                                                                                                                                                                                                        |
|----------------------------------------------|------------------------------------------------|-----------------------|----------------------------------------------|----------------------------------------------------------------------------------------------------------------------------------------------------------------------------------------------------------------------------------------------------------------------------------------------------------------------------------------------------------|
| HSA04512_ECM_RECEPTOR_INTERACTION            | 31                                             | 86                    | 1.48E-013                                    | COL11A1, COL11A2, COL5A1, LAMA1, ITGA5, LAMB3, SDC3, SDC1, ITGA2, SDC2, ITGA3, COL6A2, COL6A3, COL5A2, COL6A1, COL1A2, ITGA10, LAMA5, LAMA4, COL1A1, ITGA11, ITGA6, COL3A1, HSPG2, COL4A2, ITGB1, CD44, FN1, COL4A1, ITGA9, DAG1                                                                                                                         |
| HSA04510_FOCAL_ADHESION                      | 45                                             | 198                   | 6.39E-011                                    | <b>PDGFRB</b> , COL11A1, COL11A2, PDGFC, LAMA1, ITGA5, RAC2, FARP2, ITGA2, ITGA6, MYLK, ITGA3, <b>FLT1</b> , CAV1, LAMA5, COL4A1, VCL, COL6A2, COL6A3, COL5A2, COL6A1, COL1A2, ITGA10, PAK3, LAMA4, LAMB3, COL1A1, ITGA11, <b>EGFR</b> , MYL9, JUN, <b>MET</b> , COL4A2, ITGB1, COL3A1, FN1, FLNC, PRKCA, FLNB, ITGA9, COL5A1, VEGFC, VEGFA, CAPN2, TLN2 |
| BREAST_CANCER_ESTROGEN_SIGNALING             | 24                                             | 100                   | 6.24E-007                                    | RAC2, TNFAIP2, SERPINE1, TGFA, NGFR, CLU, <b>TIE1</b> , STC2, F3, FGF1, COL6A1, <b>KIT</b> , PAPP, GSN, AZGP1, IGF1R, <b>EGFR</b> , ITGA6, JUN, CTSB, PLA, SERPINA3, CD44, IL6                                                                                                                                                                           |
| HSA04610_COMPLEMENT_AND_COAGULATION_CASCADES | 19                                             | 68                    | 7.63E-007                                    | BDKRB1, F2R, C4A, BDKRB2, PROS1, C1S, C1R, C5, CF1, CD55, PLA, PLAT, A2M, TFP1, F3, SERPINE1, SERPIND1, SERPINA5, PLAUR                                                                                                                                                                                                                                  |
| HSA04360_AXON_GUIDANCE                       | 27                                             | 127                   | 1.66E-006                                    | GNAI1, CXCR4, RAC2, SEMA5A, SEMA6A, EFN2, EFNA5, SEMA3D, <b>NRP1</b> , L1CAM, SEMA3E, PAK3, UNC5B, NFATC1, NTN4, <b>MET</b> , SEMA3B, PLXNA2, ITGB1, <b>EPHA3</b> , SEMA6D, SEMA3G, <b>EPHB2</b> , <b>EPHB3</b> , SLIT3, LIMK2, ABLIM3                                                                                                                   |
| CARDIACEGFPATHWAY                            | 8                                              | 17                    | 1.86E-005                                    | PRKCA, ADAM12, FOS, <b>EGFR</b> , JUN, EDN1, EDNRB, NFKB1                                                                                                                                                                                                                                                                                                |
| HSA03320_PPAR_SIGNALING_PATHWAY              | 15                                             | 68                    | 2.14E-004                                    | DBI, GK, FADS2, SORBS1, MMP1, ACSL5, FABP7, ACSL3, FABP5, RXRG, LPL, CYP27A1, ACSL1, SCD, CPT1A                                                                                                                                                                                                                                                          |
| IL1RPATHWAY                                  | 9                                              | 32                    | 6.06E-004                                    | IL1RAP, IL1R1, MAP3K1, IL6, TGF1, TGF13, JUN, IRAK2, NFKB1                                                                                                                                                                                                                                                                                               |
| PROSTAGLANDIN_SYNTHESIS_REGULATION           | 8                                              | 28                    | 1.08E-003                                    | ANXA1, PTGER2, ANXA3, PTGER4, ANXA8, PLA2G4A, EDN1, EDNRB                                                                                                                                                                                                                                                                                                |
| LYSINE_DEGRADATION                           | 8                                              | 28                    | 1.08E-003                                    | ALDH1A1, PLOD2, AADAT, SHMT1, ALDH1B1, PLOD3, ALDH1A3, AASS                                                                                                                                                                                                                                                                                              |

| Molecular Signature Database Gene Set               | # of Genes in the Set | # of Differentially Expressed Genes | p-value for Enrichment (Fisher's Exact Test) | List of Differentially Expressed Genes in the Set                                                                                                                                                                                                                                                                                                                                  |
|-----------------------------------------------------|-----------------------|-------------------------------------|----------------------------------------------|------------------------------------------------------------------------------------------------------------------------------------------------------------------------------------------------------------------------------------------------------------------------------------------------------------------------------------------------------------------------------------|
| HSA04510_FOCAL_ADHESION                             | 198                   | 47                                  | 7.41E-016                                    | <b>PDGFRB</b> , ILK, COL11A1, PDGFC, CAV2, PIK3CG, PDGFB, ITGA5, RAC2, PAK1, FARP2, ARHGAP5, ITGA6, MYLK, ITGA4, ACTN1, ITGA3, COL1A2, <b>FLT1</b> , CAV1, ITGB3, <b>KDB</b> , ITGB8, PDGFD, VCL, COL6A3, ITGA8, ITGA10, LAMA4, <b>IGF1R</b> , TLN1, COL1A1, ITGA11, <b>EGFR</b> , MYL9, JUN, <b>MET</b> , FIGF, ITGB1, FN1, FLNC, FLNB, ITGA9, COL5A1, VEGFC, <b>ERBB2</b> , SPP1 |
| HSA04512_ECM_RECEPTOR_INTERACTION                   | 86                    | 23                                  | 1.51E-009                                    | COL1A2, COL11A1, COL5A1, ITGA5, SDC3, SDC1, ITGA6, ITGA4, ITGA3, ITGB3, ITGB8, COL6A3, ITGA8, ITGA10, LAMA4, COL1A1, ITGA11, ITGB1, FN1, SV2C, ITGA9, DAG1, SPP1                                                                                                                                                                                                                   |
| BREAST_CANCER_ESTROGEN_SIGNALING                    | 100                   | 21                                  | 6.87E-007                                    | AR, AZGP1, NGFR, <b>KIT</b> , CLU, PAPP, GSN, IL6, IGF1R, IL6R, STC2, <b>EGFR</b> , JUN, RAC2, TGFA, SERPINE1, ITGA6, FGF1, SERPINA3, <b>ERBB2</b> , PLA                                                                                                                                                                                                                           |
| INTEGRIN_MEDIATED_CELL_ADHESION_KEGG                | 93                    | 20                                  | 8.44E-007                                    | ITGA8, ILK, TLN1, ITGA10, RAC2, ITGB3, TNS1, ITGB1, CAV2, ITGB8, ITGA11, SORBS1, ITGA5, CAV1, PAK1, VCL, ITGA6, ITGA9, ITGA4, ITGA3                                                                                                                                                                                                                                                |
| HSA04640_HEMATOPOIETIC_CELL_LINEAGE                 | 87                    | 19                                  | 1.23E-006                                    | MME, IL1R1, IL1B, <b>KIT</b> , IL7R, IL7, IL6, IL6R, CSF2RA, KITLG, CD9, ITGB3, ITGA5, TFRC, ITGA6, CD55, ITGA4, ANPEP, ITGA3                                                                                                                                                                                                                                                      |
| HSA05218_MELANOMA                                   | 70                    | 15                                  | 2.04E-005                                    | <b>PDGFRB</b> , MITF, PDGFC, IGF1R, PIK3CG, PDGFB, <b>EGFR</b> , PDGFD, FGF14, FGF13, FGF12, FGF1, FGF2, <b>MET</b> , FGF5                                                                                                                                                                                                                                                         |
| HSA04520_ADHERENS_JUNCTION                          | 74                    | 15                                  | 4.09E-005                                    | SNAI2, TJP1, SNAI1, LEF1, IGF1R, <b>ERBB2</b> , PTNRJ, SORBS1, <b>EGFR</b> , RAC2, FARP2, VCL, <b>MET</b> , ACTN1, WASF3                                                                                                                                                                                                                                                           |
| PROSTAGLANDIN_SYNTHESIS_REGULATION                  | 28                    | 8                                   | 2.19E-004                                    | ANXA6, HPGD, PTGER2, PTGER, EDNRA, EDN1, EDNRB, PLA2G4A                                                                                                                                                                                                                                                                                                                            |
| ST_DICTYOSTELIUM_DISCOIDEUM_CAMP_CHEMOTAXIS_PATHWAY | 32                    | 8                                   | 5.94E-004                                    | ITPR3, ITGA9, DAG1, PDE3B, DGKA, ITPR1, PAK1, ANGPTL2                                                                                                                                                                                                                                                                                                                              |
| O_GLYCAN_BIOSYNTHESIS                               | 13                    | 5                                   | 7.73E-004                                    | GALNT10, GALNT6, GCNT1, ST3GAL4, GALNT7                                                                                                                                                                                                                                                                                                                                            |

**Suppl. Table 4.** shRNA sequences based on siRNA sequences.

| shRNA ID                      | Oligonucleotide sequence                                         |
|-------------------------------|------------------------------------------------------------------|
| shRNACONTROL (sense)          | TGGAATCTCATTTCGATGCATACTTCAAGAGAGTATGCATCGAATGAGATTCCCTTTTTTC    |
| shRNACONTROL (antisense)      | TCGAGAAAAAAGGAATCTCATTTCGATGCATACTCTCTTGAAGTATGCATCGAATGAGATTCCA |
| shPDGFR $\beta$ 2 (sense)     | TGAGCGACGGTGGCTACATGTTCAAGAGACATGTAGCCACCGTCGCTCTTTTTTC          |
| shPDGFR $\beta$ 2 (antisense) | TCGAGAAAAAAGAGCGACGGTGGCTACATGTCTCTTGAACATGTAGCCACCGTCGCTCA      |
| shPDGFR $\beta$ 3 (sense)     | TGAAGCCACGTTACGAGATCTTCAAGAGAGATCTCGTAACGTGGCTTCTTTTTTC          |
| shPDGFR $\beta$ 3 (antisense) | TCGAGAAAAAAGAAGCCACGTTACGAGATCTCTCTTGAAGATCTCGTAACGTGGCTTCA      |
| shPDGFR $\beta$ 4(sense)      | TGGTGGGCACACTACAATTTCCACACCAAATTGTAGTGTGCCACCTTTTTTC             |
| shPDGFR $\beta$ 4 (antisense) | TCGAGAAAAAAGGTGGGCACACTACAATTTGGTGTGGAAATTGTAGTGTGCCACCA         |
| shNRAS1 (sense)               | TGAGCAGATTAAGCGAGTAATTCAAGAGATTACTCGCTTAATCTGCTCTTTTTTC          |
| shNRAS1 (antisense)           | TCGAGAAAAAAGAGCAGATTAAGCGAGTAATCTCTTGAATTACTCGCTTAATCTGCTCA      |
| shNRAS2 (sense)               | TGAAATACGCCAGTACCGAATTCAAGAGATTTCGGTACTGGCGTATTTCTTTTTTC         |
| shNRAS2 (antisense)           | TCGAGAAAAAAGAAATACGCCAGTACCGAATCTCTTGAATTTCGGTACTGGCGTATTTCA     |
| shNRAS3 (sense)               | TGTGGTGATGTAACAAGATATTCAAGAGATATCTTGTACATCACCACCTTTTTTC          |
| shNRAS3 (antisense)           | TCGAGAAAAAAGTGGTGATGTAACAAGATATCTCTTGAATATCTTGTACATCACCACA       |
| shNRAS4 (sense)               | TGCACTGACAATCCAGCTAATTCAAGAGATTAGCTGGATTGTCAGTGCTTTTTTC          |
| shNRAS4 (antisense)           | TCGAGAAAAAAGCACTGACAATCCAGCTAATCTCTTGAATTAGCTGGATTGTCAGTGCA      |

**Suppl. Table 5.** Quantifying mRNA and gDNA copy numbers: genes, primers and real-time PCR conditions.

| <b>mRNA</b>                    | <b>Forward</b>       | <b>Reverse</b>       |
|--------------------------------|----------------------|----------------------|
| <i>N-RAS</i>                   | ACAGTGCCATGAGAGACCAA | TCGCTTAATCTGCTCCCTGT |
| <i>B-RAF</i>                   | ATGTTGAATGTGACAGCACC | CTCACACCACTGGGTAACAA |
| <i>PDGFR<math>\beta</math></i> | TTCCATGCCGAGTAACAGAC | CGTTGGTGATCATAGGGGAC |
| Tubulin                        | GACAGCTCTTCCACCCAGAG | TGAAGTCCTGTGCACTGGTC |
| <i>GAPDH</i>                   | CAATGACCCCTTCATTGACC | GACAAGCTTCCCGTTCTCAG |
| <b>gDNA</b>                    | <b>Forward</b>       | <b>Reverse</b>       |
| <i>N-RAS</i>                   | TTGGATTGTGTCGGTTGAGC | ACCCTGAGTCCCATCATCAC |
| Globin                         | AATTCACCCACCAGTGCAG  | CTTCCCGTTCTCAGCCTTGA |

A single step at 95°C for 10 min preceded 40 cycles of amplification (95°C for 30 s, 52°C for 30 s, and 72°C for 30 s). Subsequently, melting curve analysis was performed as follows: 95°C for 10 s, 52°C for 10 s, and 95°C for 10 s.
